# Supplementary material
Source: PubMed Central journal article supplement (PMC7027938)
Supplement: NIHMS1553082-supplement-1.pdf [file NIHMS1553082-supplement-1.pdf]

## Supplemental Data - Table of contents

### 1. Supplemental figures

- **Figure S1:** QQ plot of the primary and restricted cross-disorder meta-analyses
- **Figure S2:** Manhattan plot of the primary and restricted BPD meta-analyses
- **Figure S3:** Regional plot for genome-wide significant findings of the primary BPD meta-analysis
- **Figure S4:** Manhattan plot of ADHD meta-analysis

### 2. Supplemental tables

- **Table S1a:** Description of individual study sample data for the ADHD meta-analysis
- **Table S1b:** Description of individual study sample data for the BPD meta-analysis
- **Table S2:** Results and sample sizes of LDSR analyses between other (partially overlapping) ADHD and BPD samples.
- **Table S3:** Association p-values  $<10^{-6}$  of the Primary Cross disorder meta-analysis and the corresponding p-values for the other meta-analyses
- **Table S4:** Number of associated eQTLs per gene
- **Table S5:** Polymorphisms with allele-specific binding of transcription factors or miRNAs

### 3. Supplemental references

## 1. Supplemental figures

**Figure S1.** QQ plot of the primary (A) and restricted (B) cross-disorder meta-analyses.

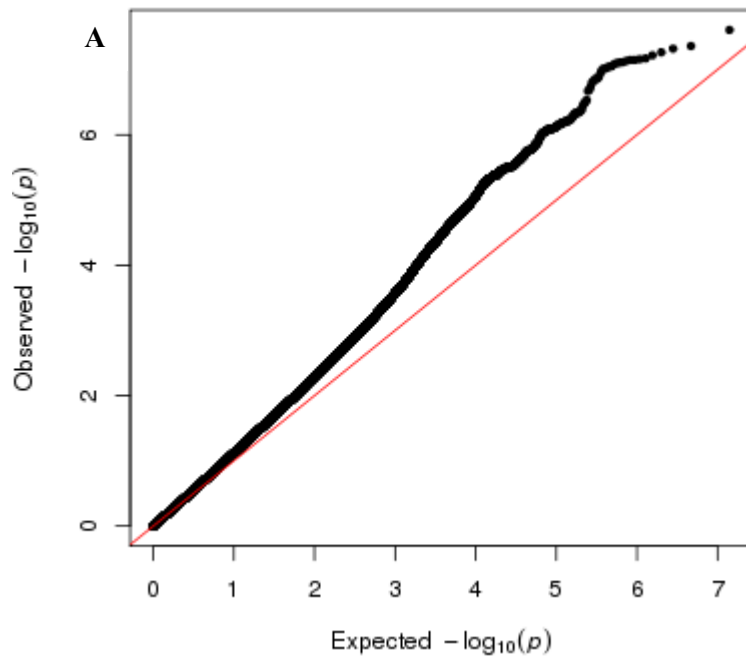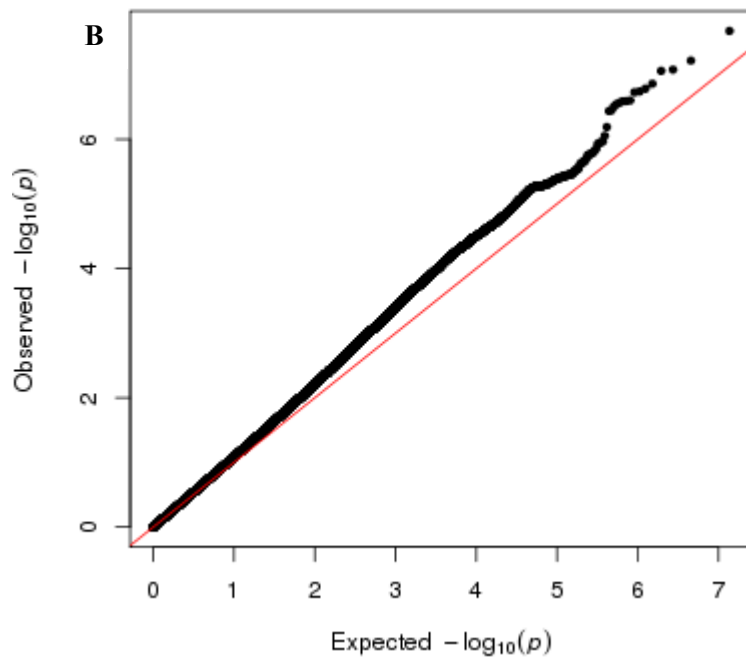

**Figure S2.** Manhattan plot of the primary (A) and restricted (B) BPD meta-analyses. Only SNPs with  $p$  values  $\leq 0.05$  are shown; Horizontal lines show threshold for genome-wide significance ( $p < 5 \times 10^{-8}$  in red) and suggestive association ( $p < 1 \times 10^{-6}$  in blue).

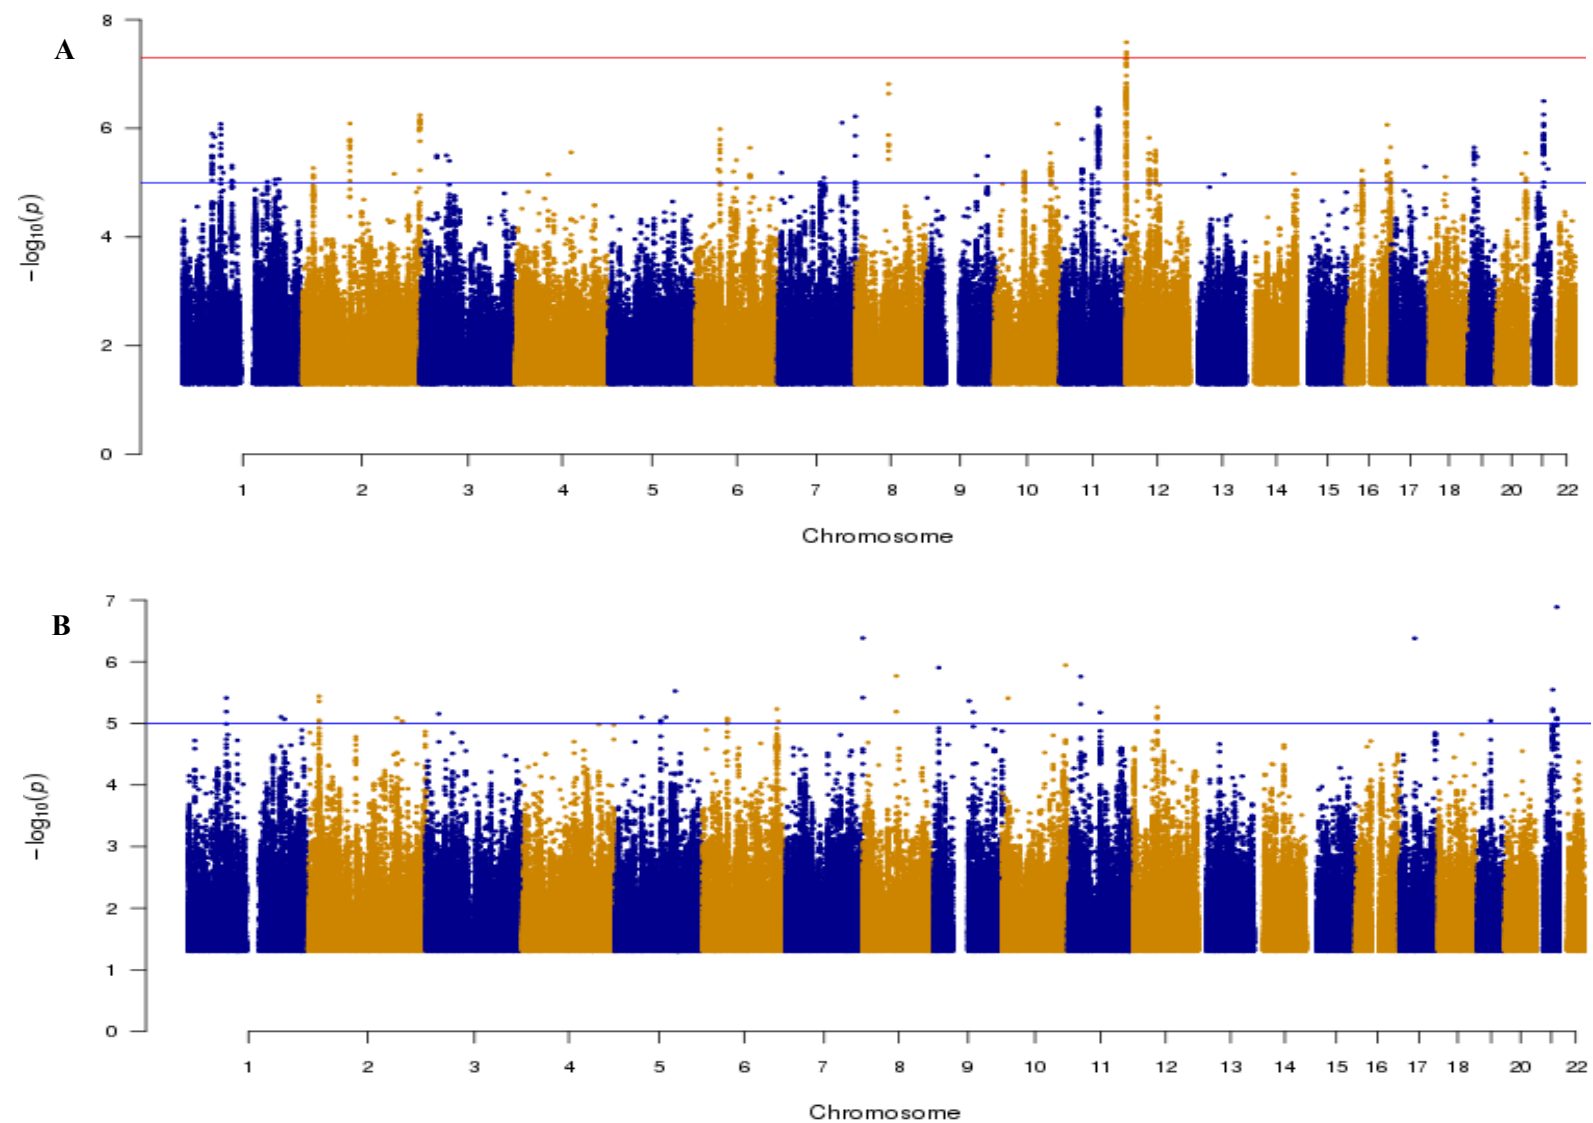

**Figure S3.** Regional plot for genome-wide significant locus on chromosome 12 for the primary BPD meta-analysis.

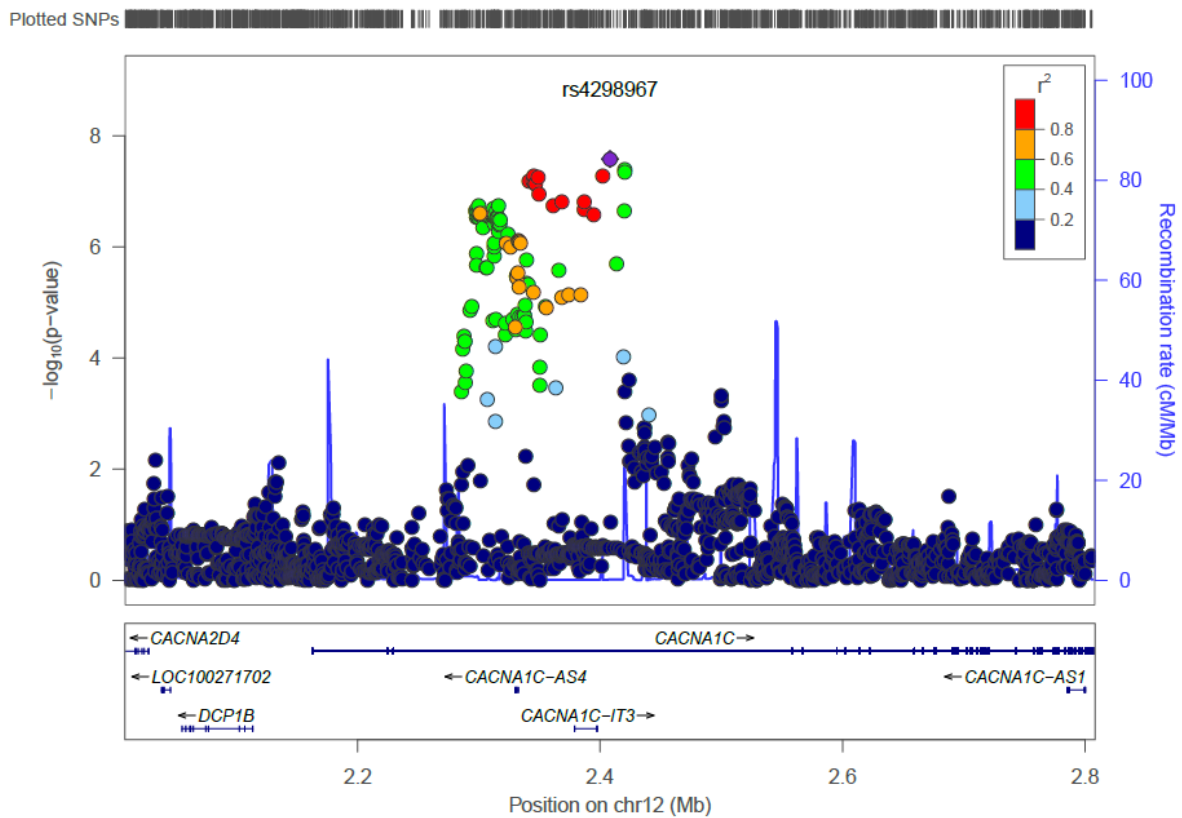

Results are shown as  $-\log(p\text{-value})$  for genotyped and imputed SNPs. The SNP showing strongest association is shown in the purple circle. The color of the remaining markers reflects  $r^2$  of the strongest associated SNP. The recombination rate is plotted in blue.

**Figure S4.** Manhattan plot of ADHD meta-analysis. Horizontal line shows threshold for suggestive association ( $p < 1 \times 10^{-6}$ ).

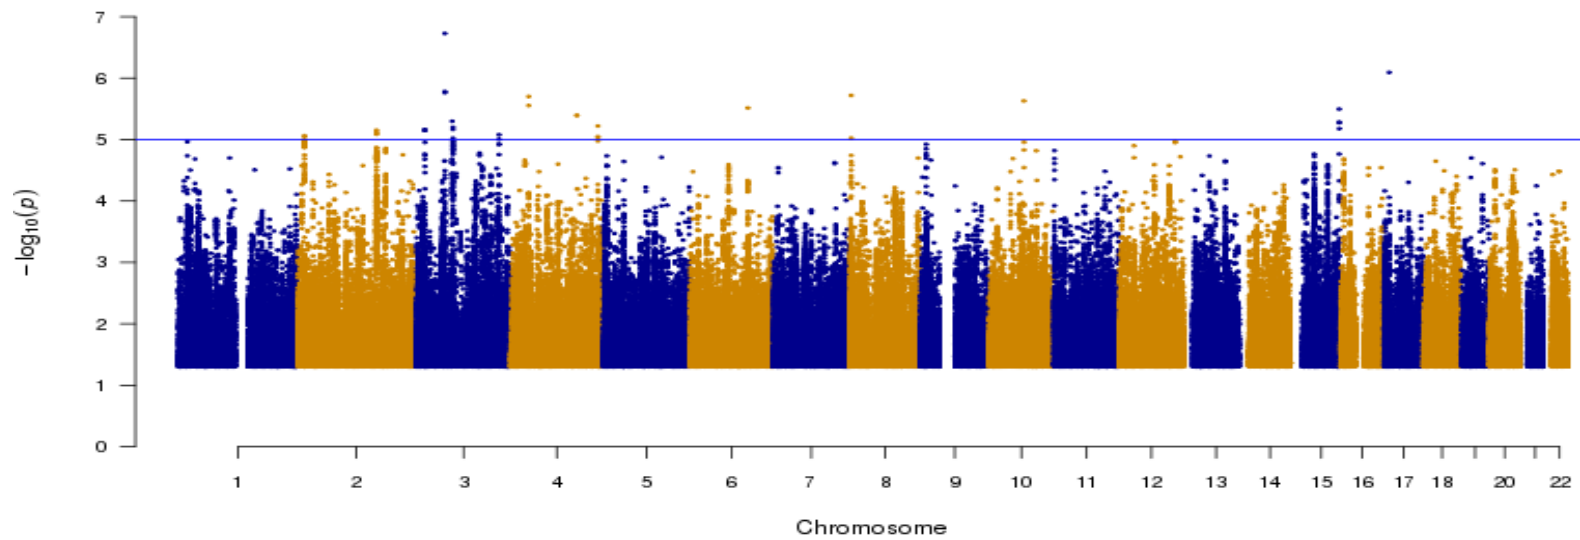

**Figure S5.** Forest plots of markers reaching genome-wide significance in cross-disorder analyses; the contribution of results from individual GWAS to disorder-specific meta-analyses is shown.

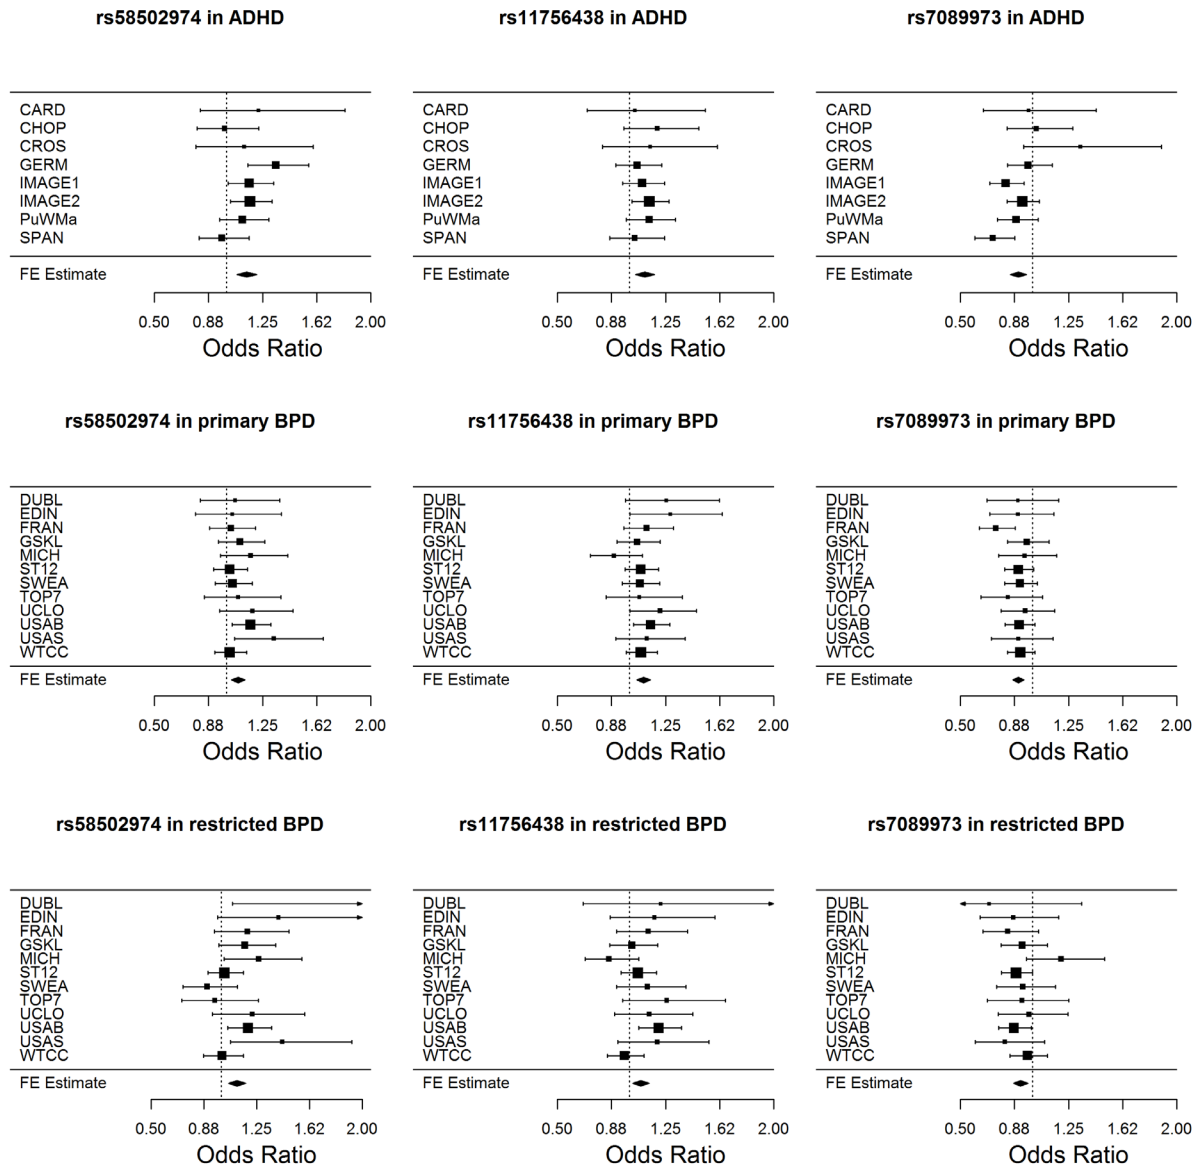

**Table S1a.** Description of individual study sample data contributions and genotyping platforms for studies included in the ADHD meta-analysis.

| <b>Study name</b> |                                                                                                                                  | <b>Study design</b> | <b>Ancestry</b>               | <b>Cases (N)</b> | <b>Controls (N)</b>      | <b>Genotyping platform</b>                                                                | <b>Reference<sup>a</sup></b> |
|-------------------|----------------------------------------------------------------------------------------------------------------------------------|---------------------|-------------------------------|------------------|--------------------------|-------------------------------------------------------------------------------------------|------------------------------|
| Short             | Full sample name                                                                                                                 |                     |                               |                  |                          |                                                                                           |                              |
| CARD              | Cardiff University                                                                                                               | Case/control        | Caucasian                     | 641              | 1,752                    | Illumina Human660W-Quad BeadChip (ADHD cases) and Illumina Human 1.2M BeadChip (controls) | [1]                          |
| GERM              | ADHD patient sample consisted of children and adolescents Aachen, Cologne, Essen, Marburg, Regensburg, and Würzburg              | Case/control        | Caucasian                     | 494              | 1,297                    | Illumina Human660W-Quadv1(ADHD cases) and Illumina HumanHap550v3 (controls)               | [2]                          |
| IMAGE2            | Phase II of IMAGE                                                                                                                | Case/control        | Predominantly European origin | 787              | 2,942                    | Affymetrix 5.0 array (ADHD cases) and Affymetrix 6.0 array (controls)                     | [3]                          |
| SPAN              | Hospital Universitari Vall d'Hebron, Barcelona                                                                                   | Case/control        | Caucasian                     | 591              | 432                      | Illumina HumanOmni1-Quad BeadChip platform                                                | [4]                          |
| CHOP              | Children's Hospital of Philadelphia                                                                                              | Trio                | European descent              | 358              |                          | Illumina Infinium II HumanHap550 BeadChip                                                 | [5]                          |
| CROS              | Canadian sample (SickKids)                                                                                                       | Trio                | Mainly Caucasian              | 170              |                          | Affymetrix 6.0 array                                                                      | [6]                          |
| IMAGE1            | Phase I of the International Multisite ADHD Genetics Project                                                                     | Trio                | Western European origin       | 866              |                          | Perlegen Sciences 600 K                                                                   | [7]                          |
| PuWMa             | Pfizer funded study from the University of California, Los Angeles, Washington University and the Massachusetts General Hospital | Trio                | Mainly Caucasian              | 702              |                          | Illumina Human1M or Human1M-Duo BeadChip platform                                         | [8]                          |
| <b>TOTAL</b>      |                                                                                                                                  |                     |                               | <b>4,609</b>     | <b>8,519<sup>b</sup></b> |                                                                                           |                              |

<sup>a</sup> Primary publication reporting individual study sample. <sup>b</sup> Including 2,096 pseudocontrols.

**Table S1b.** Description of individual study sample data contributions and genotyping platforms for studies included in the BPD meta-analysis.

| Short        | Study name                                                                    |              | Ancestry                  | Cases (N) (Cases in restricted sample between brackets) | Controls (N)  | Genotyping platform                                       | Reference <sup>a</sup> |
|--------------|-------------------------------------------------------------------------------|--------------|---------------------------|---------------------------------------------------------|---------------|-----------------------------------------------------------|------------------------|
|              | Full sample name                                                              | Study design |                           |                                                         |               |                                                           |                        |
| <b>DUBL</b>  | Trinity College Dublin                                                        | Case/control | Irish                     | 150 (26)                                                | 796           | Affymetrix 500K, 5.0 and 6.0                              | [9]                    |
| <b>EDIN</b>  | University of Edinburgh                                                       | Case/control | Scottish                  | 282 (141)                                               | 275           | Affymetrix 500K<br>Illumina                               | [10]<br>[11]           |
| <b>FRAN</b>  | French                                                                        | Case/control | French                    | 451 (198)                                               | 1631          | HumanHap300,<br>HumanHap550,<br>Human610-Quad<br>Illumina | [12]                   |
| <b>GSKL</b>  | GlaxoSmithKline                                                               | Case/control | British/Canadian/Scottish | 745 (510)                                               | 903           | HumanHap550<br>Illumina                                   | [10]                   |
| <b>MICH</b>  | NIMH/Pritzker                                                                 | Case/control | European/American         | 723 (471)                                               | 533           | HumanHap550<br>Illumina                                   | [10]                   |
| <b>ST12</b>  | Systemic Treatment Enhancement Program for Bipolar Disorder (STEP1 and STEP2) | Case/control | European-American         | 1574 (1150)                                             | 1416          | Affymetrix 500K                                           | [10]                   |
| <b>SWEA</b>  | Stockholm                                                                     | Case/control | Swedish                   | 789 (201)                                               | 2041          | Affymetrix 5.0 and 6.0                                    | [13]                   |
| <b>TOP7</b>  | Thematically Organized Psychosis                                              | Case/control | Norwegian                 | 407 (213)                                               | 221           | Affymetrix 6.0                                            | [14]                   |
| <b>UCLO</b>  | University College London                                                     | Case/control | British                   | 465 (227)                                               | 494           | Affymetrix 500K                                           | [10]                   |
| <b>USAB</b>  | Intermittent WAVE2 sample B                                                   | Case/control | European/American         | 1922 (1059)                                             | 1100          | Affymetrix 6.0                                            | --                     |
| <b>USAS</b>  | Intermittent WAVE2 sample S                                                   | Case/control | European/American         | 435 (209)                                               | 500           | Affymetrix 6.0                                            | --                     |
| <b>WTCC</b>  | Welcome Trust Case-Control Consortium                                         | Case/control | British                   | 1712 (762)                                              | 2934          | Affymetrix 500K                                           | [15]                   |
| <b>TOTAL</b> |                                                                               |              |                           | <b>9,650 (5,167)</b>                                    | <b>12,844</b> |                                                           |                        |



**Table S2.** Results and sample sizes of previous LDSR analyses.

| <b>Trait 1</b>     | <b>Trait 2</b>    | <b>Heritability (trait 2)</b> | <b>SE<sub>h2</sub></b> | <b>RG</b> | <b>SE<sub>rg</sub></b> | <b>Z</b> | <b>P-value</b> |
|--------------------|-------------------|-------------------------------|------------------------|-----------|------------------------|----------|----------------|
| ADHD               | BPD*              | 0.431                         | 0.039                  | 0.404     | 0.151                  | 26.792   | 0.007          |
| BPD full sample    | ADHD <sup>†</sup> | 0.278                         | 0.112                  | 0.262     | 0.140                  | 18.695   | 0.061          |
| BPD age restricted | ADHD <sup>†</sup> | 0.260                         | 0.110                  | 0.271     | 0.195                  | 13.902   | 0.164          |

**Trait1:** Input information from the ADHD and BPD samples used in this paper; **Trait 2:** Input information from: \*Bipolar Disease sample from PGC BIP working group 2011, N=16,731; <sup>†</sup>ADHD sample from Neale 2010[3], N=5,422; **heritability (trait 2):** Observed SNP-based heritability of trait 2 (univariate); **SE<sub>h2</sub>:** Standard error of the observed SNP-based heritability of trait 2; **RG:**genetic correlation between trait 1 and trait 2; **SE<sub>rg</sub>:**Standard error of the estimated genetic correlation between trait 1 and trait 2; **Z:**Z-score of genetic correlation between trait 1 and trait 2; **P-value:** P-value estimated for genetic correlation between trait 1 and trait 2.

**Table S3.** Association p-values  $<10^{-6}$  of the Primary Cross disorder meta-analysis and the corresponding p-values for the Restricted Cross disorder MA, Primary BDP MA, Restricted BDP MA and the ADHD MA.

| SNP               | CHR | BP        | P                |                     | P              |                   | P        |              | Gene |
|-------------------|-----|-----------|------------------|---------------------|----------------|-------------------|----------|--------------|------|
|                   |     |           | Primary cross MA | Restricted cross MA | Primary BDP MA | Restricted BDP MA | ADHD MA  |              |      |
| rs7089973         | 10  | 116569565 | 2,47E-08         | 1,12E-05            | 2,14E-03       | 4,39E-06          | 1,56E-03 | TAF9BP2      |      |
| rs11756438        | 6   | 118993632 | 4,36E-08         | 1,31E-05            | 5,29E-03       | 1,85E-05          | 6,14E-04 | CEP85L       |      |
| rs11756440        | 6   | 118993642 | 4,79E-08         | 1,43E-05            | 5,29E-03       | 1,85E-05          | 6,81E-04 | CEP85L       |      |
| rs17794346        | 10  | 116643095 | 5,45E-08         | 2,35E-05            | 4,77E-03       | 1,10E-05          | 1,38E-03 | TAF9BP2      |      |
| rs1334489         | 6   | 118639387 | 6,06E-08         | 7,25E-06            | 1,72E-02       | 1,77E-04          | 4,65E-05 | CEP85L       |      |
| rs55711292        | 10  | 116604870 | 6,75E-08         | 4,05E-05            | 3,54E-03       | 5,13E-06          | 3,73E-03 | TAF9BP2      |      |
| rs2093369         | 6   | 118649044 | 6,94E-08         | 9,69E-06            | 2,05E-02       | 1,88E-04          | 5,08E-05 | CEP85L       |      |
| rs36089581        | 10  | 116623059 | 7,13E-08         | 3,46E-05            | 3,42E-03       | 6,26E-06          | 3,26E-03 | TAF9BP2      |      |
| rs7772845         | 6   | 118646016 | 7,14E-08         | 1,01E-05            | 2,09E-02       | 1,90E-04          | 5,20E-05 | CEP85L       |      |
| rs749649          | 10  | 116641999 | 7,36E-08         | 3,20E-05            | 3,57E-03       | 7,50E-06          | 2,82E-03 | TAF9BP2      |      |
| rs6911339         | 6   | 118653621 | 7,72E-08         | 1,01E-05            | 2,08E-02       | 2,02E-04          | 5,26E-05 | CEP85L       |      |
| chr6_118642268_D  | 6   | 118642268 | 7,84E-08         | 9,16E-06            | 1,63E-02       | 1,68E-04          | 7,10E-05 | CEP85L       |      |
| rs17721283        | 10  | 116644141 | 7,95E-08         | 3,28E-05            | 3,17E-03       | 6,87E-06          | 3,33E-03 | TAF9BP2      |      |
| rs6906332         | 6   | 118653336 | 8,27E-08         | 1,15E-05            | 2,24E-02       | 2,08E-04          | 5,53E-05 | CEP85L       |      |
| rs12775180        | 10  | 116639754 | 8,92E-08         | 3,78E-05            | 4,21E-03       | 9,16E-06          | 2,81E-03 | TAF9BP2      |      |
| rs6911035         | 6   | 118653705 | 8,98E-08         | 1,29E-05            | 2,33E-02       | 2,11E-04          | 6,00E-05 | CEP85L       |      |
| rs12771956        | 10  | 116576228 | 9,37E-08         | 4,66E-05            | 5,52E-03       | 1,04E-05          | 2,59E-03 | TAF9BP2      |      |
| rs68085797        | 10  | 116632130 | 9,70E-08         | 4,31E-05            | 3,28E-03       | 6,39E-06          | 4,35E-03 | TAF9BP2      |      |
| rs61867966        | 10  | 116584362 | 9,76E-08         | 5,27E-05            | 4,30E-03       | 6,97E-06          | 4,02E-03 | TAF9BP2      |      |
| rs12772800        | 10  | 116630962 | 1,05E-07         | 5,23E-05            | 3,68E-03       | 6,32E-06          | 4,75E-03 | TAF9BP2      |      |
| rs34096808        | 3   | 173540106 | 1,22E-07         | 7,82E-05            | 1,91E-02       | 3,31E-05          | 1,01E-03 | NLGN1        |      |
| rs35157674        | 3   | 173494503 | 1,37E-07         | 4,94E-05            | 6,10E-03       | 1,58E-05          | 2,52E-03 | NLGN1        |      |
| rs58502974        | 5   | 7755900   | 1,39E-07         | 2,11E-08            | 2,34E-04       | 6,74E-04          | 1,85E-05 | ADCY2        |      |
| rs11750832        | 5   | 7756170   | 1,42E-07         | 6,07E-08            | 4,64E-04       | 5,57E-04          | 2,65E-05 | ADCY2        |      |
| rs10489744        | 1   | 165380623 | 1,52E-07         | 7,25E-06            | 2,46E-03       | 4,84E-05          | 8,36E-04 | RXRG         |      |
| rs2134095         | 1   | 165377552 | 1,60E-07         | 6,91E-06            | 2,59E-03       | 5,63E-05          | 7,42E-04 | RXRG         |      |
| chr2_188776397_I  | 2   | 188776397 | 1,87E-07         | 4,80E-05            | 2,03E-03       | 6,88E-06          | 8,09E-03 | ds LINC01090 |      |
| rs7706982         | 5   | 7758622   | 2,06E-07         | 8,39E-08            | 6,26E-04       | 7,60E-04          | 2,63E-05 | ADCY2        |      |
| rs4380617         | 5   | 7758961   | 2,14E-07         | 8,75E-08            | 6,29E-04       | 7,68E-04          | 2,73E-05 | ADCY2        |      |
| rs34187191        | 10  | 116644972 | 2,93E-07         | 7,75E-05            | 8,05E-03       | 2,96E-05          | 2,93E-03 | TAF9BP2      |      |
| rs968847          | 10  | 116758079 | 3,11E-07         | 4,12E-06            | 3,82E-04       | 2,77E-05          | 3,35E-03 | TAF9BP2      |      |
| chr10_116769011_D | 10  | 116769011 | 3,29E-07         | 4,32E-06            | 4,68E-04       | 3,38E-05          | 2,88E-03 | TAF9BP2      |      |
| rs3767339         | 1   | 165378064 | 3,45E-07         | 9,46E-06            | 4,03E-03       | 1,37E-04          | 6,19E-04 | RXRG         |      |
| rs7711377         | 5   | 7772199   | 3,82E-07         | 2,87E-07            | 4,82E-04       | 4,16E-04          | 1,47E-04 | ADCY2        |      |
| rs7700884         | 5   | 7779142   | 4,25E-07         | 3,12E-07            | 6,20E-04       | 5,24E-04          | 1,19E-04 | ADCY2        |      |
| rs11162556        | 1   | 79261383  | 4,27E-07         | 1,62E-06            | 3,86E-06       | 1,90E-06          | 4,29E-02 | us ADGRL4    |      |
| chr6_118801236_D  | 6   | 118801236 | 4,51E-07         | 4,15E-06            | 4,66E-02       | 4,29E-03          | 3,06E-06 | CEP85L       |      |
| rs11153768        | 6   | 118988152 | 4,54E-07         | 2,55E-05            | 7,02E-03       | 1,23E-04          | 9,39E-04 | CEP85L       |      |
| rs2078383         | 6   | 118706643 | 4,62E-07         | 1,17E-05            | 6,25E-03       | 2,32E-04          | 4,25E-04 | CEP85L       |      |
| rs10872167        | 6   | 118988362 | 4,62E-07         | 2,53E-05            | 7,22E-03       | 1,30E-04          | 9,03E-04 | CEP85L       |      |
| rs7703532         | 5   | 7756316   | 4,69E-07         | 1,65E-07            | 4,79E-04       | 7,67E-04          | 8,17E-05 | ADCY2        |      |
| rs12661338        | 6   | 118794690 | 4,71E-07         | 1,86E-05            | 9,87E-03       | 2,51E-04          | 3,90E-04 | CEP85L       |      |
| rs72836518        | 10  | 116763984 | 5,24E-07         | 7,79E-06            | 6,06E-04       | 3,88E-05          | 4,09E-03 | TAF9BP2      |      |
| rs4235588         | 5   | 7756917   | 5,44E-07         | 1,88E-07            | 5,19E-04       | 8,43E-04          | 8,59E-05 | ADCY2        |      |
| chr10_116764076_D | 10  | 116764076 | 5,45E-07         | 7,92E-06            | 6,02E-04       | 3,95E-05          | 4,19E-03 | TAF9BP2      |      |
| rs12774597        | 10  | 116755682 | 5,72E-07         | 8,80E-06            | 6,98E-04       | 4,29E-05          | 4,04E-03 | TAF9BP2      |      |
| rs4072341         | 5   | 7757705   | 5,97E-07         | 1,38E-07            | 6,86E-04       | 1,40E-03          | 4,22E-05 | ADCY2        |      |
| rs9608816         | 22  | 30216900  | 5,97E-07         | 2,01E-05            | 1,27E-03       | 3,47E-05          | 5,25E-03 | ASCC2        |      |
| rs17427116        | 6   | 118986198 | 5,98E-07         | 3,08E-05            | 8,54E-03       | 1,65E-04          | 9,12E-04 | CEP85L       |      |
| chr10_116760754_D | 10  | 116760754 | 6,17E-07         | 2,65E-06            | 2,16E-04       | 5,06E-05          | 3,68E-03 | TAF9BP2      |      |
| rs11153730        | 6   | 118667522 | 6,20E-07         | 9,15E-05            | 4,99E-02       | 4,70E-04          | 2,33E-04 | CEP85L       |      |
| rs34453431        | 10  | 116759683 | 6,28E-07         | 9,64E-06            | 6,65E-04       | 4,12E-05          | 4,65E-03 | TAF9BP2      |      |
| rs72958930        | 6   | 118983681 | 6,39E-07         | 3,33E-05            | 8,70E-03       | 1,67E-04          | 9,75E-04 | CEP85L       |      |
| rs35029749        | 6   | 118892120 | 6,44E-07         | 2,25E-05            | 9,32E-03       | 2,63E-04          | 5,43E-04 | CEP85L       |      |
| rs72952795        | 6   | 118894271 | 6,53E-07         | 2,29E-05            | 9,29E-03       | 2,61E-04          | 5,59E-04 | CEP85L       |      |
| rs12761122        | 10  | 116753548 | 6,59E-07         | 3,52E-06            | 2,58E-04       | 4,85E-05          | 4,13E-03 | TAF9BP2      |      |
| rs11968176        | 6   | 118900940 | 6,60E-07         | 2,22E-05            | 9,27E-03       | 2,71E-04          | 5,38E-04 | CEP85L       |      |
| rs4945623         | 6   | 118980556 | 6,70E-07         | 3,36E-05            | 8,74E-03       | 1,73E-04          | 9,82E-04 | CEP85L       |      |
| rs17795212        | 10  | 116753297 | 6,71E-07         | 9,54E-06            | 7,47E-04       | 4,97E-05          | 4,10E-03 | TAF9BP2      |      |
| rs7097580         | 10  | 116754502 | 6,73E-07         | 5,60E-06            | 7,27E-04       | 8,12E-05          | 2,42E-03 | TAF9BP2      |      |
| chr6_118978895_D  | 6   | 118978895 | 6,93E-07         | 3,47E-05            | 9,05E-03       | 1,80E-04          | 9,75E-04 | CEP85L       |      |
| rs3935156         | 5   | 7757812   | 6,98E-07         | 2,52E-07            | 7,39E-04       | 1,11E-03          | 7,74E-05 | ADCY2        |      |
| rs72967533        | 6   | 118655020 | 7,09E-07         | 6,20E-05            | 3,98E-02       | 5,81E-04          | 2,05E-04 | CEP85L       |      |
| rs11752928        | 6   | 118977768 | 7,16E-07         | 3,47E-05            | 9,06E-03       | 1,86E-04          | 9,74E-04 | CEP85L       |      |
| rs2356497         | 6   | 118876539 | 7,25E-07         | 2,07E-05            | 9,25E-03       | 3,15E-04          | 4,91E-04 | CEP85L       |      |
| rs4072339         | 5   | 7758039   | 7,26E-07         | 2,59E-07            | 7,46E-04       | 1,14E-03          | 7,91E-05 | ADCY2        |      |
| rs4072340         | 5   | 7757867   | 7,40E-07         | 2,73E-07            | 7,46E-04       | 1,11E-03          | 8,40E-05 | ADCY2        |      |
| rs4479814         | 5   | 7757715   | 7,48E-07         | 1,83E-07            | 6,03E-04       | 1,26E-03          | 6,88E-05 | ADCY2        |      |
| rs11758454        | 6   | 118848799 | 7,70E-07         | 1,63E-05            | 5,36E-03       | 2,35E-04          | 7,80E-04 | CEP85L       |      |
| rs13061878        | 3   | 61620234  | 7,77E-07         | 8,79E-05            | 4,08E-02       | 4,83E-04          | 2,60E-04 | PTPRG        |      |
| chr6_118933064_D  | 6   | 118933064 | 7,81E-07         | 2,94E-05            | 1,04E-02       | 2,76E-04          | 6,49E-04 | CEP85L       |      |
| rs78757409        | 6   | 118789259 | 7,88E-07         | 2,68E-05            | 1,25E-02       | 3,68E-04          | 4,39E-04 | CEP85L       |      |
| rs16998572        | 20  | 52551884  | 7,90E-07         | 8,27E-06            | 4,57E-03       | 3,72E-04          | 4,14E-04 | ds BCAS1     |      |
| rs11967858        | 6   | 118835543 | 7,98E-07         | 2,58E-05            | 1,10E-02       | 3,35E-04          | 5,09E-04 | CEP85L       |      |

|                   |    |           |          |          |          |          |          |              |
|-------------------|----|-----------|----------|----------|----------|----------|----------|--------------|
| rs117344633       | 6  | 118837268 | 8,00E-07 | 2,67E-05 | 1,10E-02 | 3,26E-04 | 5,30E-04 | CEP85L       |
| rs6569024         | 6  | 118953374 | 8,08E-07 | 3,12E-05 | 1,15E-02 | 2,97E-04 | 6,11E-04 | CEP85L       |
| chr6_119001874_D  | 6  | 119001874 | 8,08E-07 | 8,35E-06 | 5,29E-04 | 4,95E-05 | 5,01E-03 | CEP85L       |
| rs34955242        | 3  | 173561266 | 8,19E-07 | 1,18E-04 | 7,74E-03 | 4,78E-05 | 5,23E-03 | NLGN1        |
| rs55892056        | 6  | 118995297 | 8,26E-07 | 6,09E-05 | 7,65E-03 | 1,01E-04 | 2,39E-03 | CEP85L       |
| rs11970286        | 6  | 118680374 | 8,28E-07 | 4,38E-05 | 1,76E-02 | 3,55E-04 | 4,97E-04 | CEP85L       |
| rs6906287         | 6  | 118962740 | 8,28E-07 | 3,37E-05 | 1,24E-02 | 3,09E-04 | 6,00E-04 | CEP85L       |
| rs114951787       | 6  | 118839081 | 8,28E-07 | 2,89E-05 | 1,18E-02 | 3,37E-04 | 5,29E-04 | CEP85L       |
| rs11965985        | 6  | 118789834 | 8,30E-07 | 2,60E-05 | 1,19E-02 | 3,76E-04 | 4,55E-04 | CEP85L       |
| rs151118422       | 6  | 118839487 | 8,30E-07 | 2,80E-05 | 1,17E-02 | 3,47E-04 | 5,11E-04 | CEP85L       |
| rs12135723        | 1  | 79196848  | 8,31E-07 | 3,54E-05 | 2,46E-04 | 5,21E-06 | 3,61E-02 | us ADGRL4    |
| rs11752626        | 6  | 118788652 | 8,34E-07 | 2,61E-05 | 1,19E-02 | 3,78E-04 | 4,55E-04 | CEP85L       |
| rs71420669        | 2  | 195851665 | 8,57E-07 | 1,56E-05 | 6,72E-03 | 3,43E-04 | 5,65E-04 | intergenic   |
| rs36030485        | 9  | 2411646   | 8,71E-07 | 1,94E-05 | 4,43E-04 | 1,91E-05 | 1,31E-02 | LOC105375956 |
| rs56037433        | 2  | 162575985 | 8,73E-07 | 1,75E-04 | 2,77E-02 | 1,59E-04 | 1,51E-03 | SLC4A10      |
| rs4307206         | 6  | 118813320 | 8,77E-07 | 2,91E-05 | 1,14E-02 | 3,40E-04 | 5,62E-04 | CEP85L       |
| rs17825652        | 6  | 118788986 | 8,77E-07 | 2,71E-05 | 1,21E-02 | 3,88E-04 | 4,68E-04 | CEP85L       |
| rs17226667        | 6  | 118721628 | 8,89E-07 | 2,30E-05 | 1,13E-02 | 4,26E-04 | 4,20E-04 | CEP85L       |
| rs17825393        | 6  | 118772583 | 9,10E-07 | 2,75E-05 | 1,23E-02 | 4,03E-04 | 4,65E-04 | CEP85L       |
| rs12246008        | 10 | 116761769 | 9,16E-07 | 1,27E-05 | 8,12E-04 | 5,58E-05 | 5,07E-03 | TAF9BP2      |
| rs17227124        | 6  | 118741382 | 9,17E-07 | 2,51E-05 | 1,17E-02 | 4,20E-04 | 4,45E-04 | CEP85L       |
| chr10_116760251_D | 10 | 116760251 | 9,18E-07 | 1,60E-05 | 1,15E-03 | 6,19E-05 | 4,55E-03 | TAF9BP2      |
| rs11967375        | 6  | 118823975 | 9,39E-07 | 3,33E-05 | 1,25E-02 | 3,54E-04 | 5,77E-04 | CEP85L       |
| rs968849          | 10 | 116757731 | 9,59E-07 | 1,20E-05 | 8,00E-04 | 6,09E-05 | 4,85E-03 | TAF9BP2      |
| rs11197023        | 10 | 116756226 | 9,67E-07 | 1,28E-05 | 8,29E-04 | 5,97E-05 | 4,99E-03 | TAF9BP2      |
| chr2_195851664_D  | 2  | 195851664 | 9,83E-07 | 1,16E-05 | 7,51E-03 | 5,67E-04 | 3,35E-04 | intergenic   |

Highlighted lines show genome-wide significant associations ( $p < 5 \times 10^{-8}$ ); ds=downstream; us=upstream.

**Table S4.** Number of associated eQTLs per gene filtered for  $p < 1 \times 10^{-4}$  in primary or restricted CD-GWASMA.

| Gene                   | CD-GWASMA complete     | CD-GWASMA restricted   |
|------------------------|------------------------|------------------------|
|                        | $p < 1 \times 10^{-4}$ | $p < 1 \times 10^{-4}$ |
| <i>ABHD8</i>           | 0                      | 1                      |
| <i>CACNB3</i>          | 2                      | 0                      |
| <i>CASKIN2</i>         | 0                      | 1                      |
| <i>DNPH1</i>           | 2                      | 2                      |
| <i>ENSG00000249624</i> | 28                     | 1                      |
| <i>FAM26F</i>          | 0                      | 2                      |
| <i>FRK</i>             | 0                      | 17                     |
| <i>IL10RB</i>          | 9                      | 1                      |
| <i>IL10RB-AS1</i>      | 28                     | 1                      |
| <i>LRFN4</i>           | 40                     | 25                     |
| <i>NT5DC1</i>          | 0                      | 17                     |
| <i>NT5DC2</i>          | 73                     | 16                     |
| <i>PRKAR1B</i>         | 1                      | 1                      |
| <i>RPL8</i>            | 0                      | 1                      |
| <i>SLC27A3</i>         | 0                      | 22                     |
| <i>TRIM65</i>          | 3                      | 0                      |

**Table S5.** Polymorphisms with allele-specific binding of transcription factors or miRNAs. Neuro-relevant transcription factors are highlighted in bold.

| CD-GWASMA  | rank | CHR:BP       | SNP_ID           | Alleles |     |          | Nearby Gene                        | Strand of gene location<br>upstream    downstream | SNP Location<br>upstream    downstream | Binding Site                                 |                                     |
|------------|------|--------------|------------------|---------|-----|----------|------------------------------------|---------------------------------------------------|----------------------------------------|----------------------------------------------|-------------------------------------|
|            |      |              |                  | A       | B   | p        |                                    |                                                   |                                        | Allele A                                     | Allele B                            |
| restricted | 17   | 1:160044520  | rs115077140      | T       | C   | 6,47E-07 | KCNJ10  KCNJ9                      | -  +                                              | promoter  promoter                     | <b>EVII</b>                                  | <b>VBP</b>                          |
| restricted | 21   | 21:43062771  | rs4919921        | T       | C   | 1,14E-06 | LINC001111  LOC105372813           | +  +                                              | intergenic  promoter                   | CEBPB                                        | -                                   |
| restricted | 30   | 10:104605760 | rs146504787      | A       | T   | 1,98E-06 | CYP17A1  PFN1P11  C10orf32         | -  + +                                            | promoter  promoter  promoter           | ZNF410                                       | -                                   |
| restricted | 71   | 6:118801236  | chr6_118801236_D | AC      | Del | 4,15E-06 | LOC105377968  CEP85L  LOC105377971 | -  + +                                            | promoter  intron  intron               | GMEB2                                        | -                                   |
| primary    | 1    | 10:116569565 | rs7089973        | A       | C   | 2,47E-08 | ABLIM1  FAM160B1                   | -  +                                              | intron  promoter                       | <b>ETS2</b> , NFAT                           | -                                   |
| primary    | 8    | 10:116623059 | rs36089581       | C       | G   | 7,13E-08 | FAM160B1  RPL15P13                 | +  +                                              | UTR-3  promoter                        | <b>IRX5</b> , hsa-miR-3668, hsa-miR-4666a-5p | BCL6, hsa-miR-6508-5p, hsa-miR-8067 |
| primary    | 15   | 10:116639754 | rs12775180       | T       | C   | 8,92E-08 | FAM160B1  RPL15P17                 | +  +                                              | intron  promoter                       | SMARCA3                                      | -                                   |
| primary    | 19   | 10:116584362 | rs61867966       | T       | C   | 9,76E-08 | ABLIM1  FAM160B1                   | -  +                                              | promoter  intron                       | GKLF                                         | -                                   |
| primary    | 37   | 6:118801236  | chr6_118801236_D | AC      | Del | 4,51E-07 | LOC105377968  CEP85L  LOC105377971 | -  + +                                            | promoter  intron  intron               | GMEB2                                        | -                                   |
| primary    | 56   | 6:118983681  | rs72958930       | C       | G   | 6,39E-07 | CEP85L  LOC105377969               | +  +                                              | intron  promoter                       | CEBPE_ATF4                                   | -                                   |
| primary    | 61   | 6:118980556  | rs4945623        | C       | G   | 6,70E-07 | CEP85L  LOC105377969               | +  +                                              | intron  promoter                       | <b>PAX6_HD</b>                               | <b>PAX4</b>                         |
| primary    | 67   | 6:118977768  | rs11752928       | C       | G   | 7,16E-07 | CEP85L  LOC105377969               | +  +                                              | intron  promoter                       | -                                            | <b>HRE</b> , <b>XBPI</b>            |
| primary    | 75   | 6:118789259  | rs78757409       | T       | C   | 7,88E-07 | LOC105377968  CEP85L  LOC105377971 | -  + +                                            | promoter  intron  intron               | TCF7                                         | -                                   |
| primary    | 78   | 6:118837268  | rs117344633      | T       | C   | 8,00E-07 | CEP85L  LOC105377970  PLN          | -  + + '                                          | intron  intron  promoter               | -                                            | <b>TEAD4</b>                        |
| primary    | 88   | 6:118789834  | rs11965985       | T       | C   | 8,30E-07 | LOC105377968  CEP85L  LOC105377971 | -  + +                                            | promoter  intron  intron               | PRE                                          | GRE                                 |
| primary    | 91   | 6:118788652  | rs11752626       | T       | G   | 8,34E-07 | LOC105377968  CEP85L  LOC105377971 | -  + +                                            | promoter  intron  UTR-5                | <b>FOXP1_ES</b>                              | <b>CAAT</b> , GRHL2                 |
| primary    | 99   | 6:118772583  | rs17825393       | T       | C   | 9,10E-07 | LOC105377968  CEP85L               | -  -                                              | promoter  intergenic                   | <b>BLIMP1</b> , <b>E2F</b>                   | ZNF217                              |

### 3. Supplemental references

1. Stergiakouli, E., et al., *Investigating the contribution of common genetic variants to the risk and pathogenesis of ADHD*. Am J Psychiatry, 2012. **169**(2): p. 186-94.
2. Hinney, A., et al., *Genome-wide association study in German patients with attention deficit/hyperactivity disorder*. Am J Med Genet B Neuropsychiatr Genet, 2011. **156B**(8): p. 888-97.
3. Neale, B.M., et al., *Case-control genome-wide association study of attention-deficit/hyperactivity disorder*. Journal of the American Academy of Child & Adolescent Psychiatry, 2010. **49**(9): p. 906-920.
4. Sanchez-Mora, C., et al., *Case-Control Genome-Wide Association Study of Persistent Attention-Deficit Hyperactivity Disorder Identifies FBXO33 as a Novel Susceptibility Gene for the Disorder*. Neuropsychopharmacology, 2014.
5. Elia, J., et al., *Rare structural variants found in attention-deficit hyperactivity disorder are preferentially associated with neurodevelopmental genes*. Mol Psychiatry, 2010. **15**(6): p. 637-46.
6. Mick, E., et al., *Genome-wide association study of response to methylphenidate in 187 children with attention-deficit/hyperactivity disorder*. Am J Med Genet B Neuropsychiatr Genet. 2008 Dec 5;147B(8): p. 1412-1418
7. Neale, B.M., et al., *Genome-wide association scan of attention deficit hyperactivity disorder*. American Journal of Medical Genetics Part B: Neuropsychiatric Genetics, 2008. **147**(8): p. 1337-1344.
8. Mick, E., et al., *Family-based genome-wide association scan of attention-deficit/hyperactivity disorder*. J Am Acad Child Adolesc Psychiatry, 2010. **49**(9): p. 898-905 e3.
9. Ferreira, M.A., et al., *Collaborative genome-wide association analysis supports a role for ANK3 and CACNA1C in bipolar disorder*. Nat Genet, 2008.
10. Sklar, P., et al., *Whole-genome association study of bipolar disorder*. Mol Psychiatry, 2008. **13**: p. 558-569.
11. Cichon, S., et al., *Genome-wide association study identifies genetic variation in neurocan as a susceptibility factor for bipolar disorder*. Am J Hum Genet. 2011 Mar 11;88(3): p.372-381
12. Scott, L.J., et al., *Genome-wide association and meta-analysis of bipolar disorder in individuals of European ancestry*. Proc Natl Acad Sci USA, 2009. **106**: p. 7501-7506.
13. Bergen, S.E., et al., *Genome-wide association study in a Swedish population yields support for greater CNV and MHC involvement in schizophrenia compared with bipolar disorder*. Mol Psychiatry. 2012 Sep;17(9): p. 880-886
14. Djurovic, S., et al., *A genome-wide association study of bipolar disorder in Norwegian individuals, followed by an Icelandic sample*. J Affect Disord, 2010.
15. Wellcome Trust Case Control Consortium. *Genome-wide association study of 14,000 cases of seven common diseases and 3,000 shared controls*. Nature, 2007. **447**: p. 661-678.

#### 4. Composition of Psychiatric Genomics Working Groups

##### *ADHD*

Richard J.L. Anney<sup>1</sup>, Alejandro Arias Vasquez<sup>2</sup>, Maria J. Arranz<sup>3</sup>, Philip Asherson<sup>4</sup>, Tobias J. Banaschewski<sup>5</sup>, Mònica Bayés<sup>6</sup>, Joseph Biederman<sup>7</sup>, Jan K. Buitelaar<sup>8</sup>, Miguel Casas<sup>9</sup>, Alice Charach<sup>10</sup>, Bru Cormand<sup>11</sup>, Jennifer Crosbie<sup>10</sup>, Soeren Dalsgaard<sup>12</sup>, Mark J. Daly<sup>13</sup>, Alysia E. Doyle<sup>14</sup>, Richard P. Ebstein<sup>15</sup>, Josephine Elia<sup>16</sup>, Stephen V. Faraone<sup>17</sup>, Barbara Franke<sup>18</sup>, Christine Freitag<sup>19</sup>, Michael Gill<sup>1</sup>, Hakon Hakonarson<sup>20,21</sup>, Amaia Hervas<sup>22</sup>, Peter Holmans<sup>23</sup>, Lindsey Kent<sup>24</sup>, Jonna Kuntsi<sup>4</sup>, Nanda Lambregts-Rommelse<sup>25</sup>, Kate Langley<sup>26</sup>, Klaus-Peter Lesch<sup>27,28</sup>, Sandra K. Loo<sup>29</sup>, Joanna Martin<sup>30</sup>, James J. McGough<sup>31</sup>, Sarah E. Medland<sup>32</sup>, Jobst Meyer<sup>33</sup>, Eric Mick<sup>34</sup>, Ana Miranda<sup>35</sup>, Fernando Mulas<sup>36</sup>, Benjamin M. Neale<sup>37</sup>, Stan F. Nelson<sup>29</sup>, Michael C. O'Donovan<sup>30</sup>, Robert D. Oades<sup>38</sup>, Michael J. Owen<sup>39</sup>, Haukur Palmason<sup>33</sup>, Josep A. Ramos-Quiroga<sup>40,41</sup>, Andreas Reif<sup>42</sup>, Marta Ribasés<sup>40,43</sup>, Stephan Ripke<sup>13</sup>, Herbert Roeyers<sup>44</sup>, Jasmin Romanos<sup>45</sup>, Marcel Romanos<sup>46</sup>, Aribert Rothenberger<sup>47</sup>, Cristina Sánchez-Mora<sup>40,43</sup>, Russell Schachar<sup>48</sup>, Joseph Sergeant<sup>49</sup>, Susan L. Smalley<sup>29</sup>, Edmund J.S. Sonuga-Barke<sup>50</sup>, Hans-Christoph Steinhausen<sup>51,52,53</sup>, Anita Thapar<sup>30</sup>, Alexandre Todorov<sup>54</sup>, Susanne Walitza<sup>55,45</sup>, Yufeng Wang<sup>56</sup>, Andreas Warnke<sup>45</sup>, Nigel Williams<sup>23</sup>, Yanli Zhang-James<sup>17</sup>

##### *Bipolar Disorder*

Devin Absher<sup>57</sup>, Huda Akil<sup>58</sup>, Ole A. Andreassen<sup>59,60</sup>, Adebayo Anjorin<sup>61</sup>, Lena Backlund<sup>62</sup>, Judith A. Badner<sup>63</sup>, Jack D. Barchas<sup>64</sup>, Thomas B. Barrett<sup>65</sup>, Nick Bass<sup>61</sup>, Michael Bauer<sup>66</sup>, Frank Bellivier<sup>67</sup>, Sarah E. Bergen<sup>68</sup>, Wade Berrettini<sup>69</sup>, Douglas Blackwood<sup>70</sup>, Cinnamon S. Bloss<sup>71</sup>, Michael Boehnke<sup>72</sup>, Gerome Breen<sup>73,74</sup>, René Breuer<sup>75</sup>, William E. Bunney<sup>76</sup>, Margit Burmeister<sup>77</sup>, William Byerley<sup>78</sup>, Sian Caesar<sup>79</sup>, Kim Chambert<sup>68,80</sup>, Sven Cichon<sup>81,82,83</sup>, David A Collier<sup>73</sup>, Aiden Corvin<sup>84</sup>, William Coryell<sup>85</sup>, Nick Craddock<sup>86</sup>, David W. Craig<sup>87</sup>, Mark Daly<sup>68,80</sup>, Richard Day<sup>88</sup>, Franziska Degenhardt<sup>81</sup>, Srdjan Djurovic<sup>59,89</sup>, Frank Dudbridge<sup>90</sup>, Howard J. Edenberg<sup>91</sup>, Amanda Elkin<sup>73</sup>, Bruno

Étain<sup>67</sup>, Anne Farmer<sup>73</sup>, Manuel Ferreira<sup>68,80</sup>, I. Nicol Ferrier<sup>92</sup>, Matthew Flickinger<sup>72</sup>, Tatiana Foroud<sup>93</sup>, Josef Frank<sup>75</sup>, Christine Fraser<sup>86</sup>, Louise Frisén<sup>94</sup>, Janice Fullerton<sup>95</sup>, Elliot S. Gershon<sup>63</sup>, Michael Gill<sup>84</sup>, Katherine Gordon-Smith<sup>86,96</sup>, Elaine K. Green<sup>86</sup>, Tiffany A. Greenwood<sup>97</sup>, Detelina Grozeva<sup>86</sup>, Weihua Guan<sup>72</sup>, Hugh Gurling<sup>61</sup>, Ómar Gustafsson<sup>98</sup>, Marian L. Hamshere<sup>86</sup>, Martin Hautzinger<sup>99</sup>, Chantal Henry<sup>100</sup>, Stefan Herms<sup>101</sup>, Maria Hipolito<sup>102</sup>, Peter A. Holmans<sup>86,103</sup>, Christina Hultman<sup>104</sup>, Stéphane Jamain<sup>67</sup>, Edward G. Jones<sup>105</sup>, Ian R. Jones<sup>86</sup>, Lisa Jones<sup>96</sup>, Jean-Pierre Kahn<sup>106</sup>, Radhika Kandaswamy<sup>61</sup>, John R. Kelsoe<sup>97,107</sup>, James L. Kennedy<sup>108</sup>, George Kirov<sup>86</sup>, Daniel L. Koller<sup>93</sup>, Phoenix Kwan<sup>72</sup>, Mikael Landén<sup>104,109</sup>, Niklas Langstrom<sup>109</sup>, Mark Lathrop<sup>110</sup>, Jacob Lawrence<sup>61</sup>, William B. Lawson<sup>102</sup>, Marion Leboyer<sup>67</sup>, Phil H. Lee<sup>68</sup>, Jun Li<sup>77</sup>, Paul Lichtenstein<sup>104</sup>, Danyu Lin<sup>111</sup>, Chunyu Liu<sup>63</sup>, Falk W. Lohoff<sup>69</sup>, Susanne Lucae<sup>112</sup>, Pamela B. Mahon<sup>113</sup>, Sandra Maier<sup>75</sup>, Wolfgang Maier<sup>79</sup>, Nick Martin<sup>114</sup>, Manuel Mattheisen<sup>81,115</sup>, Keith Matthews<sup>92</sup>, Morten Mattingsdal<sup>59,116</sup>, Kevin McGhee<sup>70</sup>, Peter McGuffin<sup>73,74</sup>, Melvin G. McInnis<sup>117</sup>, Andrew McIntosh<sup>70</sup>, Rebecca McKinney<sup>97</sup>, Alan W. McLean<sup>70</sup>, Francis J. McMahon<sup>118</sup>, Andrew McQuillin<sup>61</sup>, Ingrid Melle<sup>59,60</sup>, Fan Guo Meng<sup>119</sup>, Philip B. Mitchell<sup>120</sup>, Grant W. Montgomery<sup>114</sup>, Jennifer Moran<sup>68,80</sup>, Gunnar Morken<sup>121</sup>, Derek Morris<sup>84</sup>, Valentina Moskva<sup>86</sup>, Pierandrea Muglia<sup>122</sup>, Thomas W. Mühleisen<sup>81</sup>, Walter J. Muir<sup>70</sup>, Bertram Müller-Mysok<sup>112</sup>, Richard M. Myers<sup>57</sup>, Caroline M. Nievergelt<sup>97</sup>, Ivan Nikolov<sup>86</sup>, Vishwajit Nimgaonkar<sup>123</sup>, Markus M. Nöthen<sup>81</sup>, John I. Nurnberger, Jr.<sup>93,124</sup>, Evaristus A. Nwulia<sup>102</sup>, Michael C. O'Donovan<sup>86</sup>, Colm O'Dushlaine<sup>68,80</sup>, Urban Osby<sup>94</sup>, Högni Óskarsson<sup>125</sup>, Michael J. Owen<sup>86</sup>, Roy Perlis<sup>68,80</sup>, Hannes Petursson<sup>126</sup>, Benjamin S. Pickard<sup>70</sup>, James B. Potash<sup>113</sup>, Peter Propping<sup>81</sup>, Shaun Purcell<sup>68,80</sup>, Emma Quinn<sup>84</sup>, Soumya Raychaudhuri<sup>68,80</sup>, Andreas Reif<sup>127</sup>, John Rice<sup>128</sup>, Marcella Rietschel<sup>175</sup>, Stephan Ripke<sup>68,80</sup>, Douglas Ruderfer<sup>68,80</sup>, Martin Schalling<sup>94</sup>, Alan F. Schatzberg<sup>129</sup>, William A. Scheftner<sup>130</sup>, Peter R. Schofield<sup>95</sup>, Nicholas J. Schork<sup>131</sup>, Thomas G. Schulze<sup>75,118,132</sup>, Johannes Schumacher<sup>81</sup>, Markus Schwarz<sup>133</sup>, Ed Scolnick<sup>80</sup>, Laura J. Scott<sup>72</sup>, Paul D. Shilling<sup>97</sup>, Engilbert Sigurðsson<sup>126</sup>, Pamela Sklar<sup>68,80</sup>, Erin N. Smith<sup>71</sup>, Jordan Smoller<sup>68,80</sup>, David St. Clair<sup>74</sup>, Hreinn Stefansson<sup>98</sup>, Kari Stefansson<sup>98</sup>, Michael Steffens<sup>81,115</sup>, Stacy Steinberg<sup>98</sup>, John Strauss<sup>134</sup>, Jana Strohmaier<sup>75</sup>, Patrick Sullivan<sup>135</sup>, Szabolcs Szelinger<sup>87</sup>, Robert C. Thompson<sup>76</sup>, Þorgeir Þorgeirsson<sup>98</sup>, Federica Tozzi<sup>122</sup>, Jens Treutlein<sup>75</sup>, John B. Vincent<sup>134</sup>, Stanley J.



Kimm J.E. van Hulzen *et al.*

Watson<sup>58</sup>, Thomas F. Wienker<sup>115</sup>, Richard Williamson<sup>73</sup>, Stephanie H. Witt<sup>75</sup>, Adam Wright<sup>120</sup>, Wei Xu<sup>136</sup>, Allan H Young<sup>92,137</sup>, Peter P. Zandi<sup>113</sup>, Peng Zhang<sup>117</sup>, Sebastian Zöllner<sup>117</sup>

*Affiliations of PGC Workgroup members*

<sup>1</sup>Department of Psychiatry, Trinity College Dublin, Trinity Centre for Health Sciences, St. James's Hospital, Dublin, Ireland

<sup>2</sup>Radboud University Medical center Nijmegen, Donders Institute for Brain Cognition and Behavior, Departments of Psychiatry, Human Genetics and Cognitive Neuroscience, The Netherlands

<sup>3</sup>Research Foundation. University Hospital Mutua de Terrassa. Barcelona, Spain

<sup>4</sup>Kings College London, UK

<sup>5</sup>Department of Child and Adolescent Psychiatry; Central Institute of Mental Health; Medical Faculty Mannheim, University of Heidelberg; Mannheim; Germany

<sup>6</sup>Centro Nacional de Análisis Genómico (CNAG), Parc Científic de Barcelona (PCB), Catalonia, Spain

<sup>7</sup>Massachusetts General Hospital; Harvard Medical School, USA

<sup>8</sup>Radboud University Nijmegen Medical Center, The Netherlands

<sup>9</sup>Department of Psychiatry, Hospital Universitari Vall d'Hebron. CIBERSAM. Universitat Autònoma de Barcelona and Department of Psychiatry and Legal Medicine, Universitat Autònoma de Barcelona, Catalonia, Spain

<sup>10</sup>The Hospital for Sick Children, University of Toronto, Toronto, Canada

<sup>11</sup>Departament de Genètica, Facultat de Biologia, Universitat de Barcelona and Biomedical Network Research Centre on Rare Diseases (CIBERER) and Institut de Biomedicina de la Universitat de Barcelona (IBUB), Catalonia, Spain

<sup>12</sup>National Centre for Register-based Research, Aarhus University, Denmark

<sup>13</sup>Analytical and Translational Genetics Unit (ATGU) Massachusetts General Hospital, Boston, MA, USA

<sup>14</sup>Massachusetts General Hospital, USA

<sup>15</sup>National University of Singapore, Singapore, China

<sup>16</sup>duPont Children's hosp, Wilmington, DE, USA

<sup>17</sup>SUNY Upstate Medical University, USA

<sup>18</sup>Radboud University Medical Centre; Donders Institute for Brain; Cognition and Behaviour; departments of Human Genetics (855) and Psychiatry; Nijmegen, The Netherlands

<sup>19</sup>Department of Child and Adolescent Psychiatry, Psychosomatics and Psychotherapy, JW Goethe University, Frankfurt am Main, Germany

<sup>20</sup>The Center for Applied Genomics, The Children's Hospital of Philadelphia, Philadelphia, PA, USA

<sup>21</sup>Department of Pediatrics, The Perelman School of Medicine, University of Pennsylvania, Philadelphia, PA, USA

<sup>22</sup>University Hospital Mutua de Terrassa, Barcelona, Spain

<sup>23</sup>MRC Centre for Neuropsychiatric Genetics and Genomics, Department of Psychological Medicine and Neurology, School of Medicine, Cardiff University, Cardiff, UK

<sup>24</sup>University of St Andrews, UK

<sup>25</sup>Karakter Child and Adolescent Psychiatry University Center and department of Psychiatry, Donders Institute for Brain, Cognition and Behavior, Radboud University Nijmegen Medical Centre, Nijmegen, The Netherlands

<sup>26</sup>MRC Centre for Neuropsychiatric Genetics & Genomics, School of Medicine, Cardiff University, Heath Park, Cardiff, UK

<sup>27</sup>Division of Molecular Psychiatry, ADHD Clinical Research Unit, Department of Psychiatry, Psychosomatics and Psychotherapy, University of Würzburg, Germany

<sup>28</sup>Department of Neuroscience, School for Mental Health and Neuroscience (MHENS), Maastricht University, The Netherlands

<sup>29</sup>University of California Los Angeles, USA

<sup>30</sup>MRC Centre for Neuropsychiatric Genetics and Genomics and Institute of Psychological Medicine and Clinical Neurosciences, Hadyn Ellis Building, Maindy Road, Cathays, Cardiff, UK

<sup>31</sup>University of California, Los Angeles, CA, USA

<sup>32</sup>Queensland Institute of Medical Research, Australia

<sup>33</sup>Institute of Psychobiology, Department of Neurobehavioral Genetics, University of Trier, Trier, Germany

<sup>34</sup>Quantitative Health Sciences University of Massachusetts Medical School, Worcester, MA, USA

<sup>35</sup>Department of Developmental and Educational Psychology, University of Valencia, Spain

<sup>36</sup>Instituto Valenciano de Neurologia Pediátrica (INVANEP), Valencia, Spain

<sup>37</sup>Massachusetts General Hospital/Broad Institute, USA

<sup>38</sup>University of Duisburg-Essen, Germany

<sup>39</sup>MRC Centre for Neuropsychiatric Genetics and Genomics and Institute of Psychological Medicine and Clinical Neurosciences, Hadyn Ellis Building, Maindy Road, Cathays, Cardiff UK

<sup>40</sup>Department of Psychiatry, Hospital Universitari Vall d'Hebron. CIBERSAM. Universitat Autònoma de Barcelona, Spain

<sup>41</sup>Department of Psychiatry and Legal Medicine, Universitat Autònoma de Barcelona, Catalonia, Spain

<sup>42</sup>Department of Psychiatry, Psychosomatic Medicine and Psychotherapy, University Hospital, Frankfurt, Germany

<sup>43</sup>Psychiatric Genetics Unit, Vall d'Hebron Research Institute (VHIR), Barcelona, Catalonia, Spain

<sup>44</sup>Ghent University, Dunantlaan, Ghent, Belgium

<sup>45</sup>Department of Child and Adolescent Psychiatry, Psychosomatics and Psychotherapy, University of Würzburg, Würzburg, Germany

<sup>46</sup>Department of Child and Adolescent Psychiatry, Psychosomatics and Psychotherapy, University of Würzburg, Würzburg, Germany; Department of Child and Adolescent Psychiatry, Psychosomatics and Psychotherapy, University Hospital of Munich, Munich, Germany

<sup>47</sup>University Medicine Goettingen, Child and Adolescent Psychiatry, Germany

<sup>48</sup>Psychiatry, Neurosciences and Mental Health, The Hospital for Sick Children, University of Toronto, Canada

<sup>49</sup>Vrije Universiteit, De Boelelaan, Amsterdam, The Netherlands

<sup>50</sup>University of Southampton and Ghent University, UK

<sup>51</sup>University of Zurich, Switzerland

<sup>52</sup>Aalborg University, Denmark

<sup>53</sup>University of Basel, Switzerland

<sup>54</sup>Department of Psychiatry, Washington University School of Medicine, St. Louis, Missouri, USA

<sup>55</sup>Department of Child and Adolescent Psychiatry, University of Zurich, Zurich, Switzerland

<sup>56</sup>Peking University Institute of Mental Health, China

<sup>57</sup>HudsonAlpha Institute for Biotechnology, Huntsville, Alabama, USA

<sup>58</sup>Molecular and Behavioral Neuroscience Institute, University of Michigan, Ann Arbor, Michigan, USA

<sup>59</sup>Institute of Clinical Medicine, ENBREC Group, University of Oslo, Oslo, Norway

<sup>60</sup>Division of Mental Health and Addiction, Oslo University Hospital, Oslo, Norway

<sup>61</sup>Molecular Psychiatry Laboratory, Research Department of Mental Health Sciences, University College London, Rockefeller Building, 21 University Street, London, UK

<sup>62</sup>Department of Clinical Neuroscience, Karolinska Institutet, Stockholm, Sweden

<sup>63</sup>Department of Psychiatry, University of Chicago, Chicago, Illinois, USA

<sup>64</sup>Institute of Psychiatry, King's College London, University of London, London, UK

<sup>65</sup>Portland Veterans Affairs Medical Center, Portland, Oregon, USA

<sup>66</sup>Department of Psychiatry and Psychotherapy, ENBREC Group, University Hospital Carl Gustav Carus, Dresden, Germany

<sup>67</sup>INSERM U955, ENBREC Group, Department of Psychiatry, Groupe Hospitalier Henri Mondor-Albert Chenevier, AP-HP; Université Paris Est, Fondation FondaMental, Créteil 94000, France

<sup>68</sup>Psychiatric and Neurodevelopmental Genetics Unit, Department of Psychiatry and Center for Human Genetic Research, Massachusetts General Hospital and Harvard Medical School, Boston, Massachusetts 02114, USA

<sup>69</sup>Department of Psychiatry, University of Pennsylvania, Philadelphia, Pennsylvania, USA

<sup>70</sup>Division of Psychiatry, University of Edinburgh, Royal Edinburgh Hospital, Edinburgh, EH10 5HF, UK and Medical Genetics Section, University of Edinburgh Molecular Medicine Centre, Western General Hospital, Crewe Road, Edinburgh, UK

<sup>71</sup>The Scripps Translational Science Institute and Scripps Health, La Jolla, CA, USA

<sup>72</sup>Department of Biostatistics and Center for Statistical Genetics, School of Public Health, University of Michigan, Ann Arbor, Michigan, USA

<sup>73</sup>SGDP, The Institute of Psychiatry, King's College London, De Crespigny Park Denmark Hill London, UK

<sup>74</sup>University of Aberdeen, Institute of Medical Sciences, Foresterhill, Aberdeen, UK

<sup>75</sup>Department of Genetic Epidemiology in Psychiatry, Central Institute of Mental Health Mannheim, University Heidelberg, Mannheim, Germany

<sup>76</sup>Department of Psychiatry and Human Behavior, University of California, Irvine, California, USA

<sup>77</sup>Departments of Human Genetics and Psychiatry, and Molecular and Behavioral Neuroscience Institute, University of Michigan, Ann Arbor, Michigan, USA

<sup>78</sup>Department of Psychiatry, University California San Francisco School of Medicine, San Francisco, California, USA

<sup>79</sup>Department of Psychiatry, University of Bonn, Bonn, Germany

<sup>80</sup>Stanley Center for Psychiatric Research, Broad Institute of MIT and Harvard, Cambridge, Massachusetts, USA

<sup>81</sup>Institute of Human Genetics, University of Bonn, D-53127 Bonn, Germany

<sup>82</sup>Department of Genomics, Life & Brain Center, University of Bonn, Bonn, Germany

<sup>83</sup>Institute of Neuroscience and Medicine (INM-1), Research Center Juelich, Juelich, Germany

<sup>84</sup>Neuropsychiatric Genetics Research Group, Department of Psychiatry and Institute of Molecular Medicine, Trinity College Dublin, Dublin, Ireland

<sup>85</sup>Department of Psychiatry, University of Iowa, Iowa City, Iowa, USA

<sup>86</sup>MRC Centre for Neuropsychiatric Genetics and Genomics, Henry Wellcome Building, School of Medicine, Cardiff University, Heath Park, Cardiff, UK

<sup>87</sup>The Translational Genomics Research Institute, Phoenix, Arizona, USA

<sup>88</sup>School of Neurology, Neurobiology and Psychiatry, Royal Victoria Infirmary, Queen Victoria Road, Newcastle upon Tyne, UK

<sup>89</sup>Department of Medical Genetics, Oslo University Hospital, Oslo, Norway

<sup>90</sup>London School of Hygiene & Tropical Medicine, University of London, London, UK

<sup>91</sup>Department of Biochemistry and Molecular Biology, Department of Medical and Molecular Genetics, Indiana University School of Medicine, Indianapolis, Indiana, USA

<sup>92</sup>University of Dundee School of Medicine, Nethergate, Dundee, DD1 4HN, Scotland, UK

<sup>93</sup>Department of Psychiatry, Indiana University School of Medicine, Indianapolis, Indiana, USA

<sup>94</sup>Department of Molecular Medicine, Karolinska Institutet, Stockholm, Sweden

<sup>95</sup>Prince of Wales Medical Institute, Sydney, Australia, and University of New South Wales, Sydney, Australia

<sup>96</sup>Department of Psychiatry, School of Clinical & Experimental Medicine, Birmingham University, Birmingham, UK

<sup>97</sup>Department of Psychiatry, University California San Diego, La Jolla, CA, USA

<sup>98</sup>deCODE Genetics, University Hospital, Reykjavík, Reykjavik, Iceland

<sup>99</sup>Department of Clinical and Developmental Psychology, Institute of Psychology, University of Tübingen, Tübingen, Germany

<sup>100</sup>INSERM, U955, Psychiatrie Génétique; Université Paris Est, Faculté de Médecine; Assistance Publique–Hôpitaux de Paris (AP -HP), Hôpital H. Mondor–A. Chenevier, Département de Psychiatrie; ENBREC group, Fondation Fondamental, Créteil, France

<sup>101</sup>Department of Biomedicine, University Hospital Basel, Basel, Switzerland

<sup>102</sup>Department of Psychiatry and Behavioral Sciences, Howard University College of Medicine, Washington D.C., USA

<sup>103</sup>Biostatistics and Bioinformatics Unit, Cardiff University School of Medicine, Cardiff, UK

<sup>104</sup>Department of Medical Epidemiology and Biostatistics, Karolinska Institutet, Stockholm, Sweden

<sup>105</sup>Department of Psychiatry and Behavioral Sciences, Center for Neuroscience, University of California, Davis, California, USA

<sup>106</sup>Département de Psychiatrie et de Psychologie clinique, CHU de Nancy, Hôpital Jeanne-d’Arc, Toul, 54200, France; Fondation Fondamental, Créteil, France

<sup>107</sup>Department of Psychiatry, Special Treatment and Evaluation Program (STEP), Veterans Affairs San Diego Healthcare System, San Diego, CA, USA

<sup>108</sup>Psychiatric Neurogenetics Section, Centre for Addiction and Mental Health, Toronto, Canada

<sup>109</sup>Institute of Neuroscience and Physiology, University of Gothenburg, Gothenburg, Sweden

<sup>110</sup>Centre National de Génotypage, Evry, France

<sup>111</sup>Department of Biostatistics, University of North Carolina, Chapel Hill, North Carolina, USA

<sup>112</sup>Max Planck Institute of Psychiatry, Munich, Germany

<sup>113</sup>Department of Mental Health, Johns Hopkins University and Hospital, Baltimore, Maryland, USA

<sup>114</sup>Queensland Institute of Medical Research, Brisbane, Australia

<sup>115</sup>Institute for Medical Biometry, Informatics and Epidemiology, University of Bonn, Bonn, Germany

<sup>116</sup>Department of Research, Soerlandet Hospital, Kristiansand, Norway

<sup>117</sup>Department of Psychiatry, University of Michigan, Ann Arbor, Michigan, USA

<sup>118</sup>National Institute of Mental Health, National Institutes of Health, Bethesda, Maryland, USA

<sup>119</sup>Department of Psychiatry, Weill Medical College, Cornell University, New York, New York, USA

<sup>120</sup>School of Psychiatry, University of New South Wales and Black Dog Institute, Sydney, New South Wales, Australia

<sup>121</sup>Department of Psychiatry, St Olavs Hospital and Norwegian University of Science and Technology, Trondheim, Norway

<sup>122</sup>Neurosciences Centre of Excellence in Drug Discovery, GlaxoSmithKline Research and Development, Verona, Italy

<sup>123</sup>Department of Human Genetics, University of Pittsburgh, Pittsburgh, Pennsylvania, USA

<sup>124</sup>Department of Medical and Molecular Genetics, Indiana University School of Medicine, Indianapolis, Indiana, USA

<sup>125</sup>Therapeia, University Hospital, Reykjavik, Reykjavik, Iceland

<sup>126</sup>Division of Psychiatry, Landspítali University Hospital, Reykjavik, Iceland

<sup>127</sup>Department of Psychiatry, Psychosomatic Medicine and Psychotherapy, University Hospital, Frankfurt, Germany

<sup>128</sup>Washington University School of Medicine, St. Louis, Missouri, USA

<sup>129</sup>Psychiatry and Behavioral Science, Stanford University School of Medicine, Palo Alto, California, USA

<sup>130</sup>Rush University Medical Center, Chicago, Illinois, USA

<sup>131</sup>The Scripps Translational Science Institute and The Scripps Research Institute, La Jolla, California, USA

Kimm J.E. van Hulzen *et al.*

<sup>132</sup>Department of Psychiatry, University Göttingen, Göttingen, Germany

<sup>133</sup>Psychiatric Center Nordbaden, Wiesloch, Germany

<sup>134</sup>Molecular Neuropsychiatry and Development Laboratory, Centre for Addiction and Mental Health,  
Toronto, Canada

<sup>135</sup>Department of Genetics, University of North Carolina at Chapel Hill School of Medicine, Chapel  
Hill, North Carolina, USA

<sup>136</sup>Department of Biostatistics, Princess Margaret Hospital, Toronto, Canada

<sup>137</sup>UBC Institute of Mental Health, 430-5950 University Boulevard Vancouver, British Columbia,  
Canada
